# Supplementary material
Source: ML conference proceedings conference paper supplement (https://openreview.net/forum?id=Ek7qrYhJMbn)

# Room Occupancy

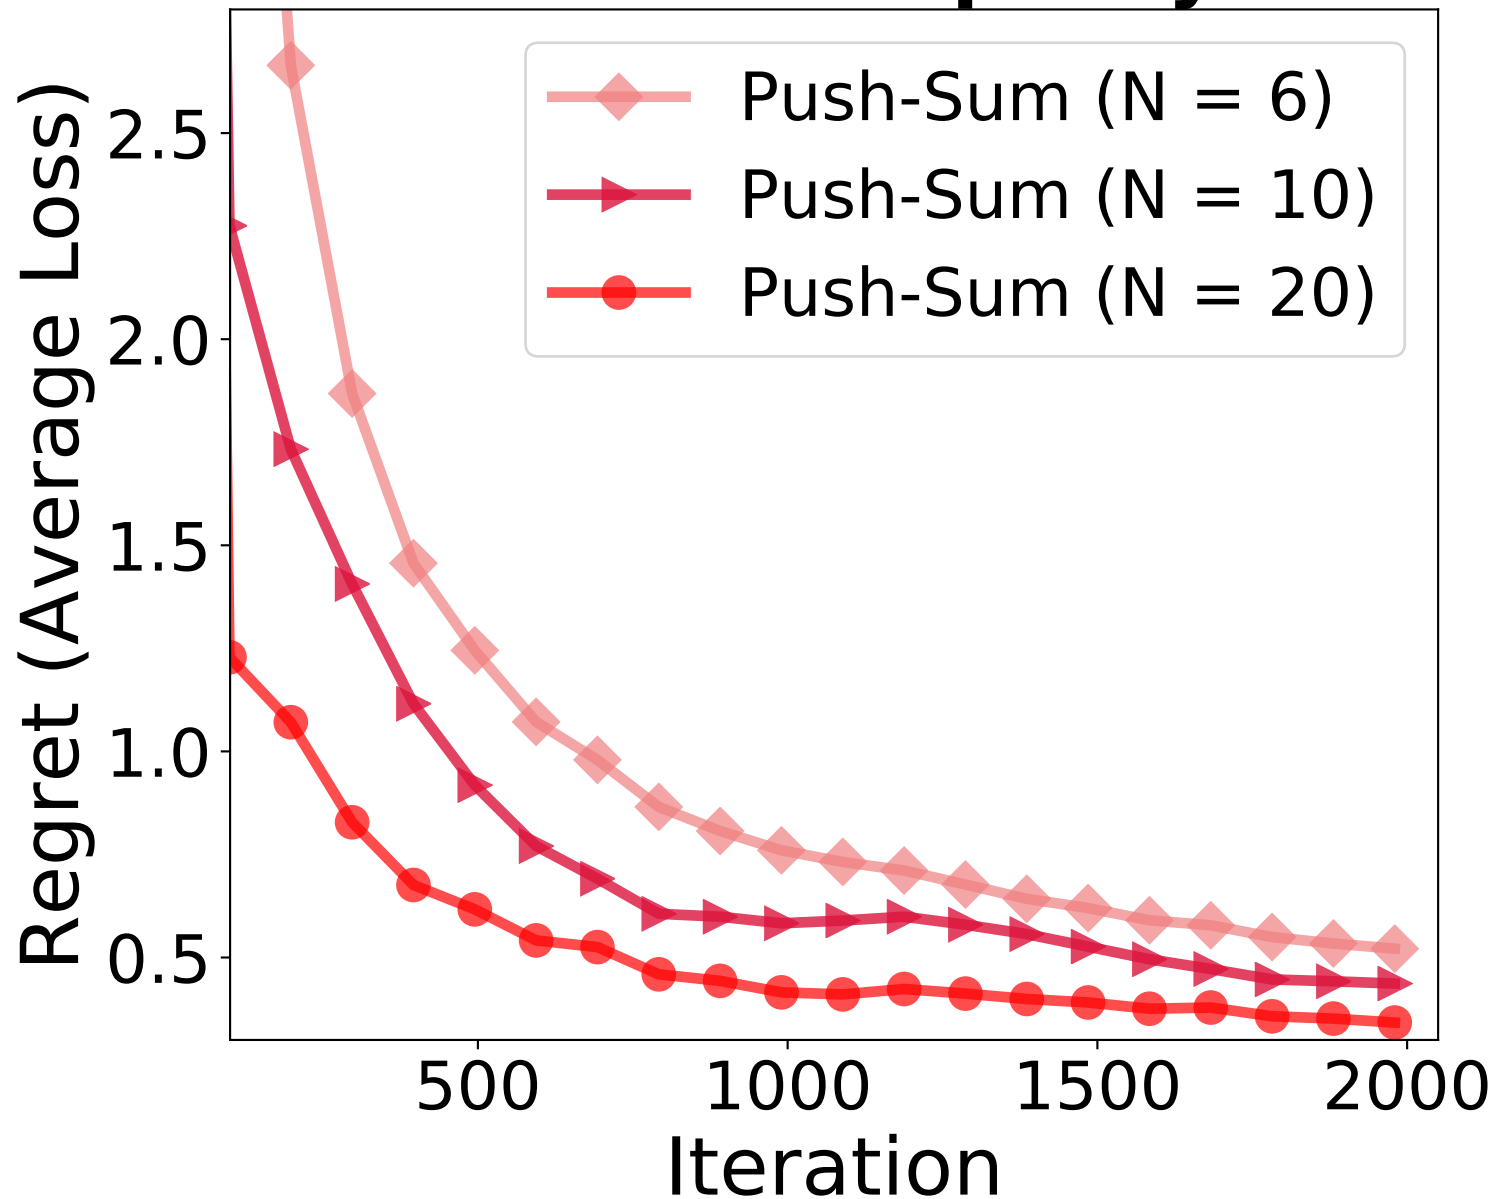

Supplement: supplementary_material [file attachment]

# SUSY

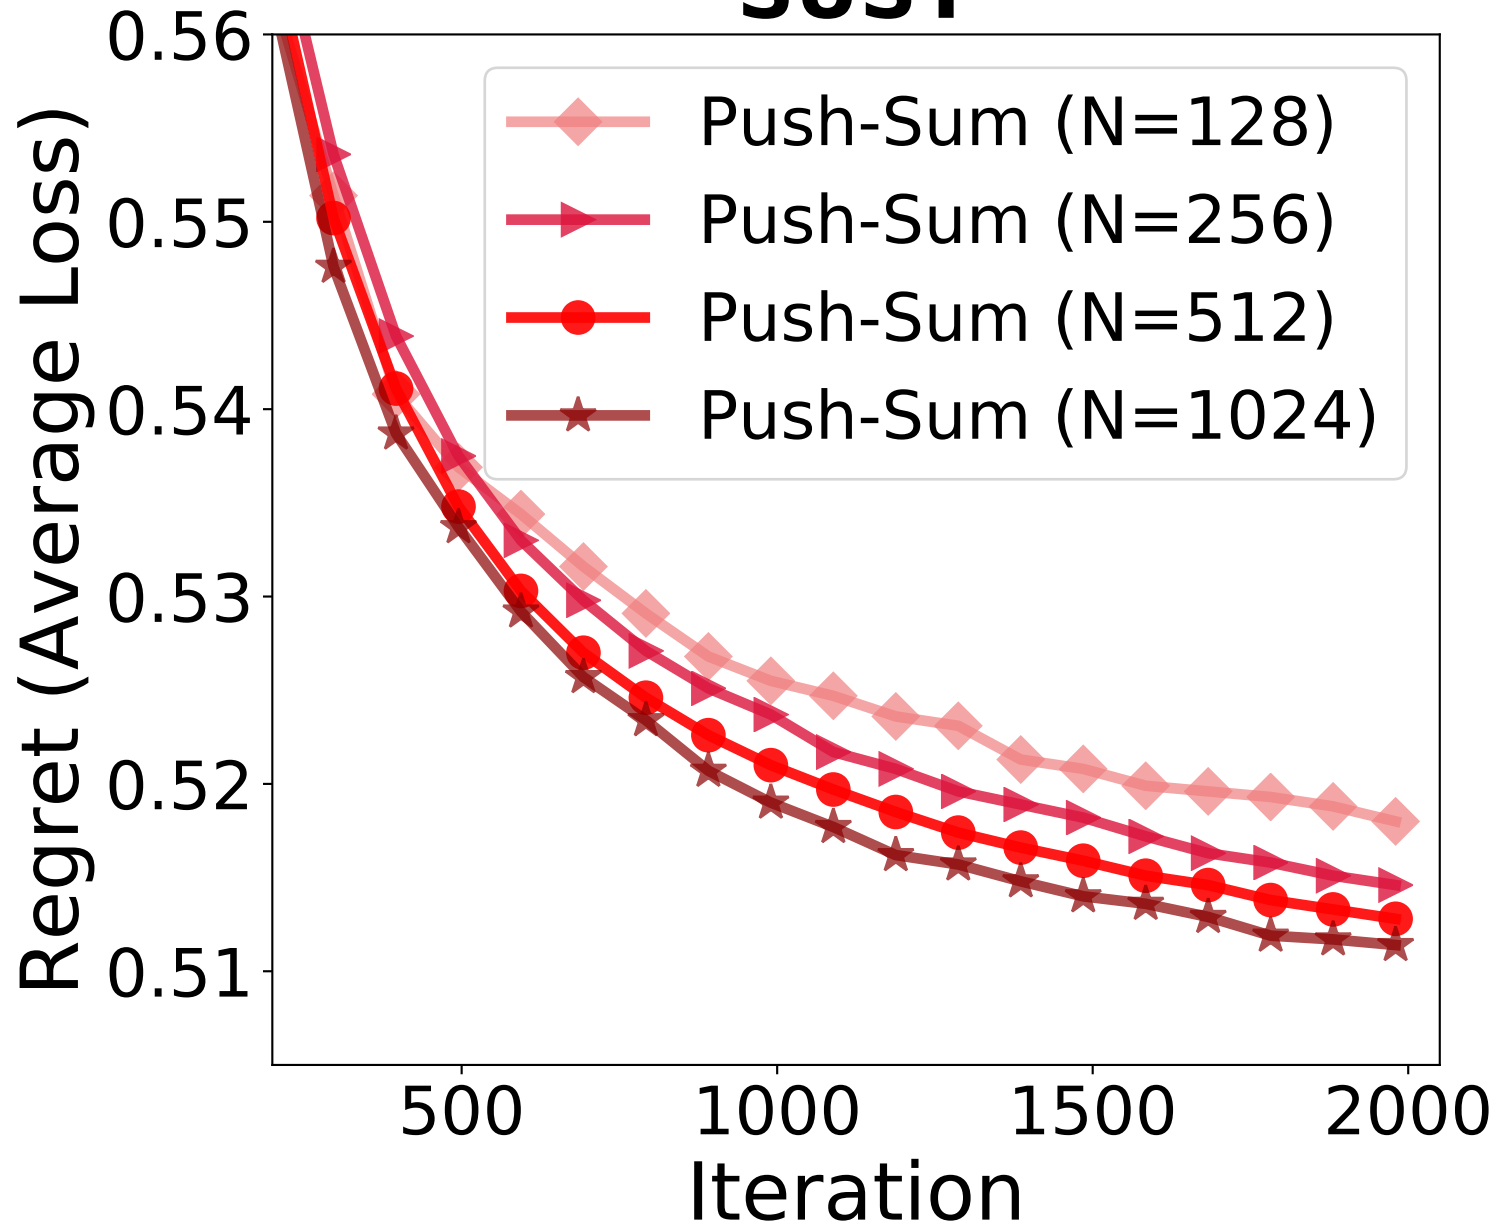

Supplement: supplementary_material [file attachment]

# Room Occupancy

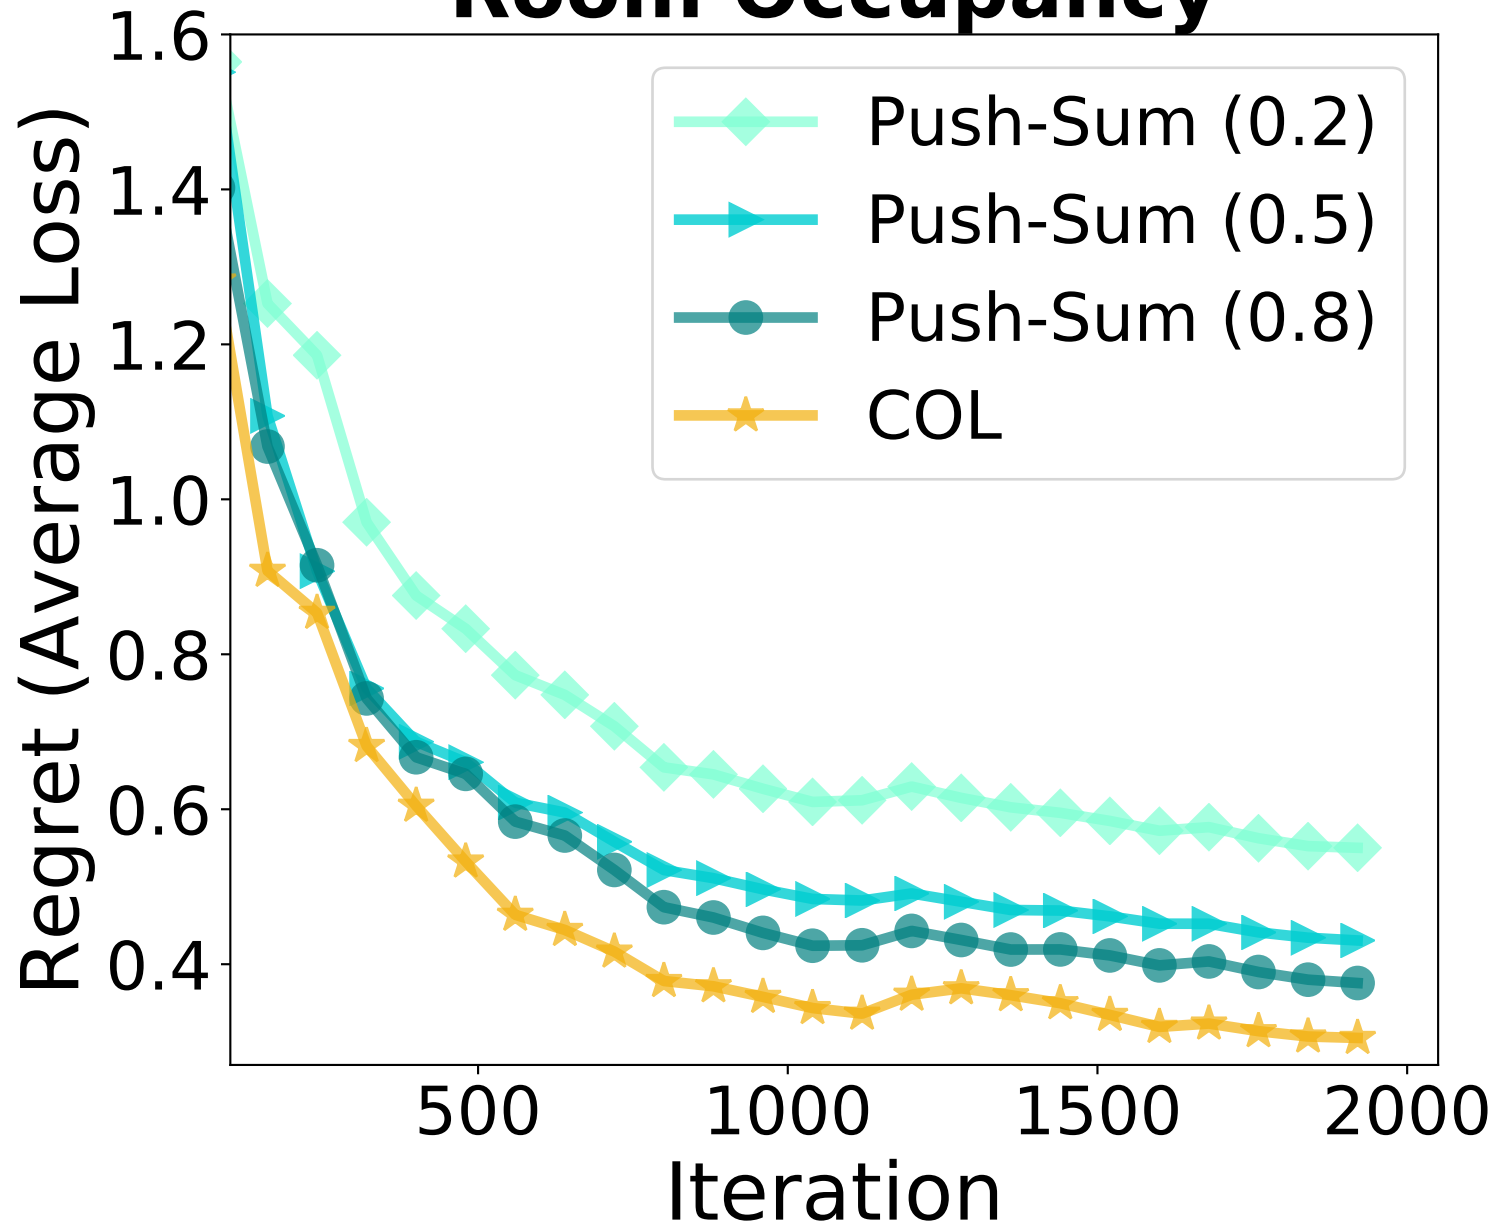

Supplement: supplementary_material [file attachment]

# SUSY

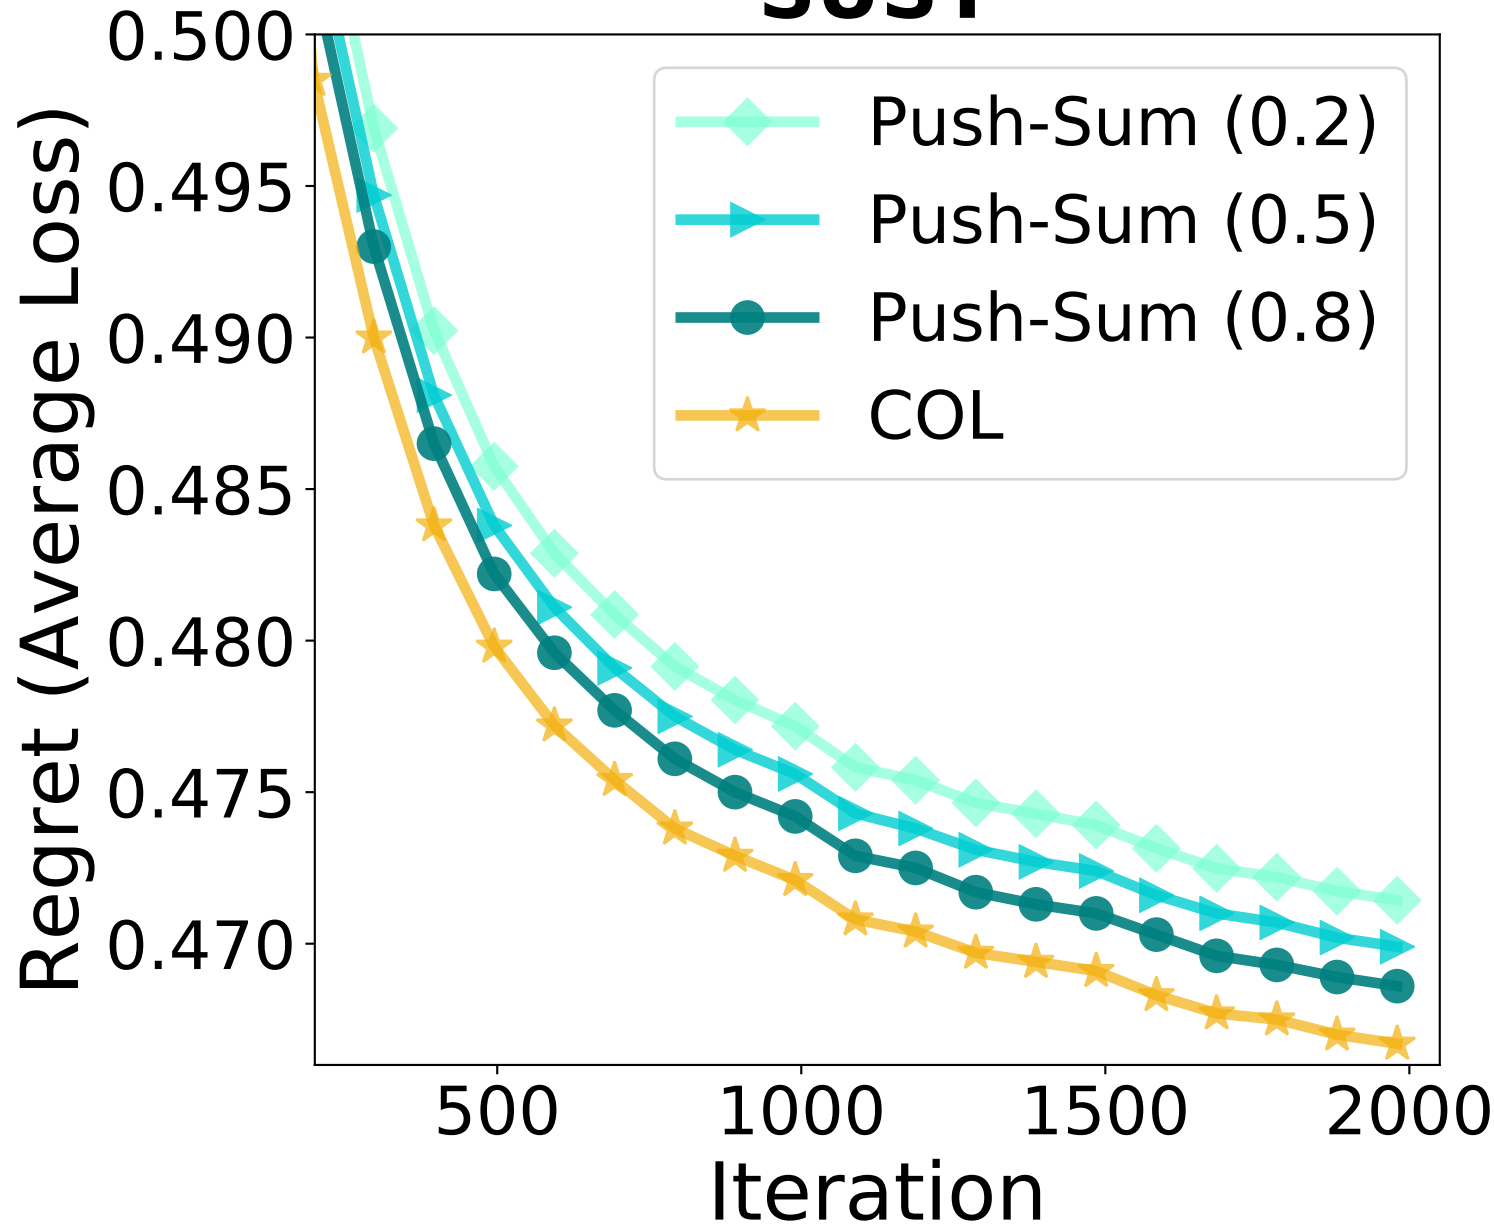

Supplement: supplementary_material [file attachment]

# SUSY

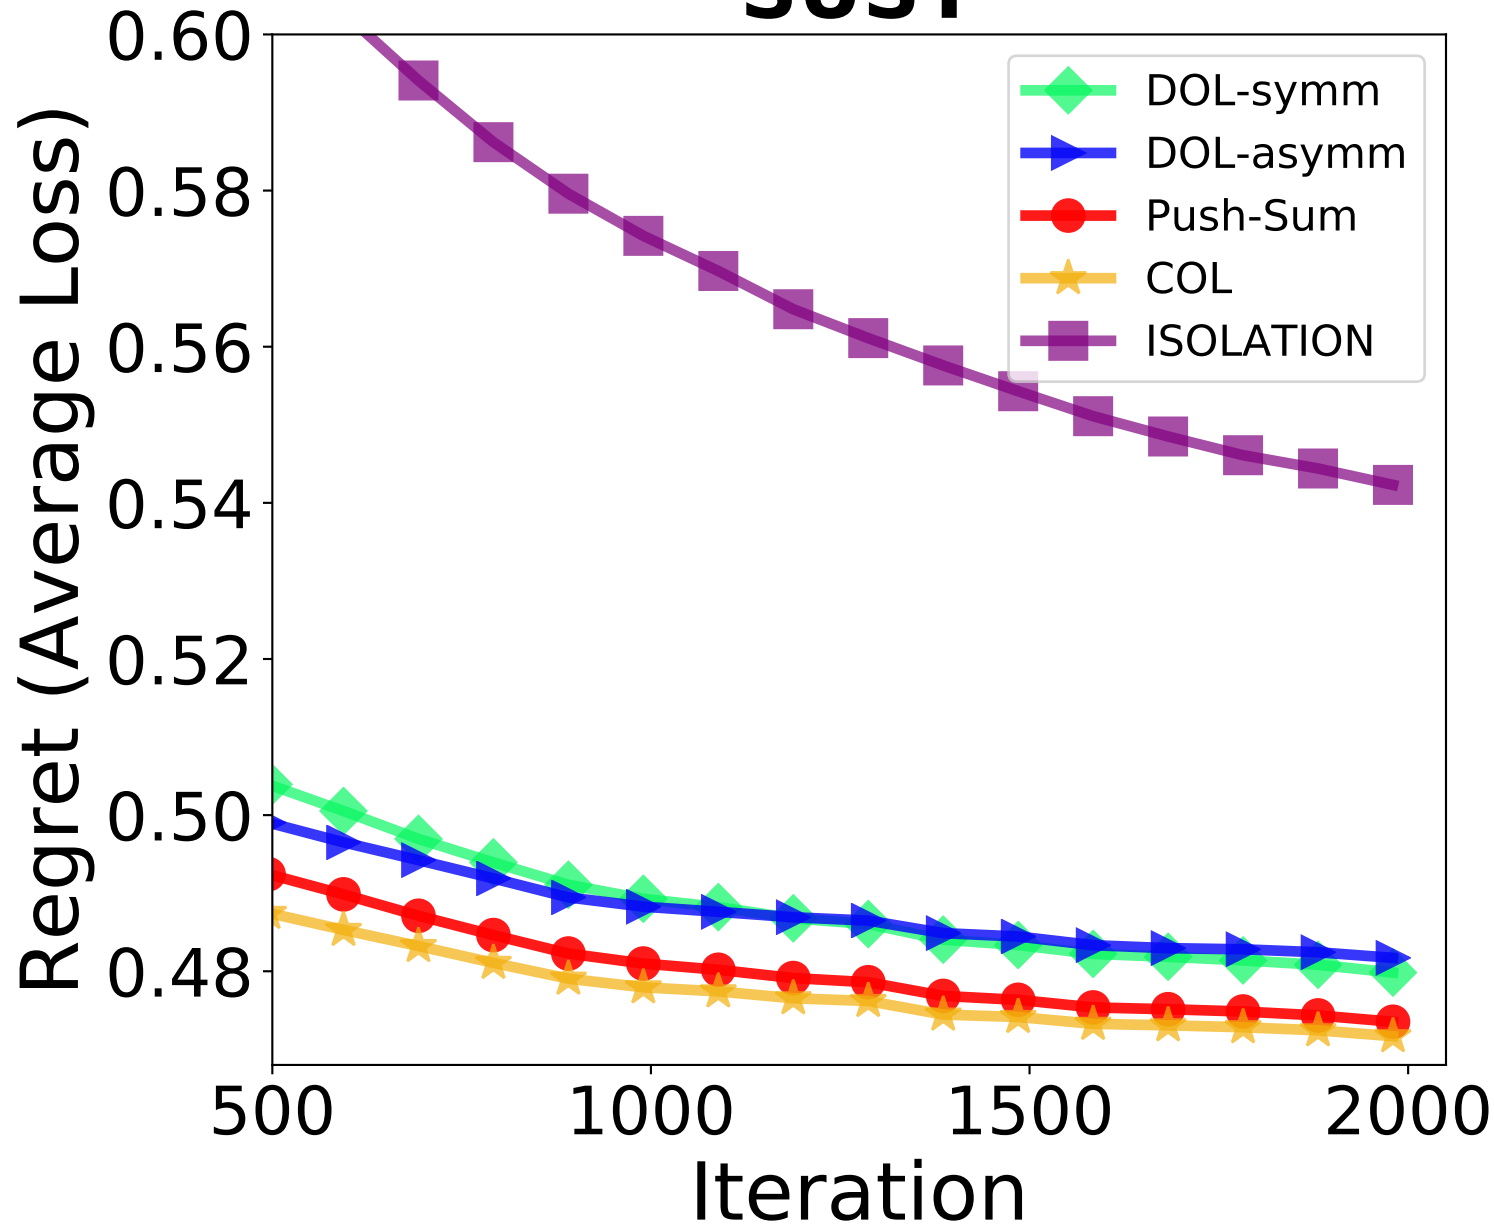

Supplement: supplementary_material [file attachment]

# Room Occupancy

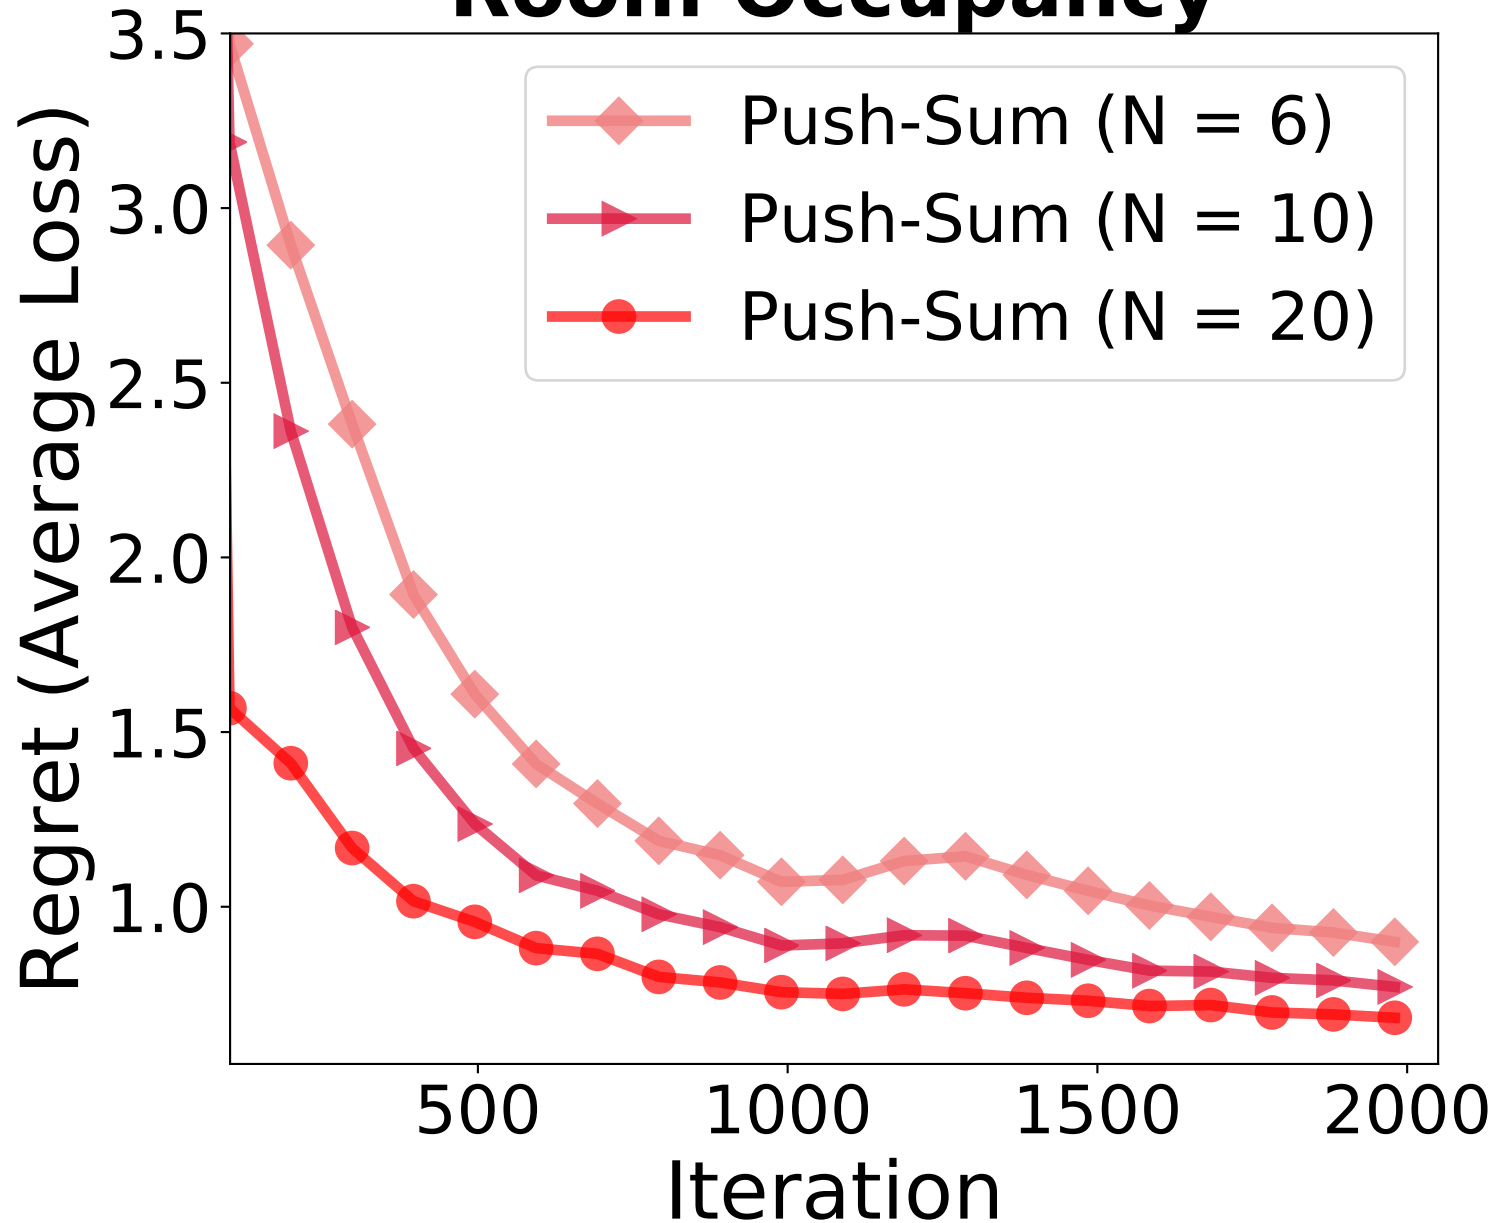

Supplement: supplementary_material [file attachment]

# SUSY

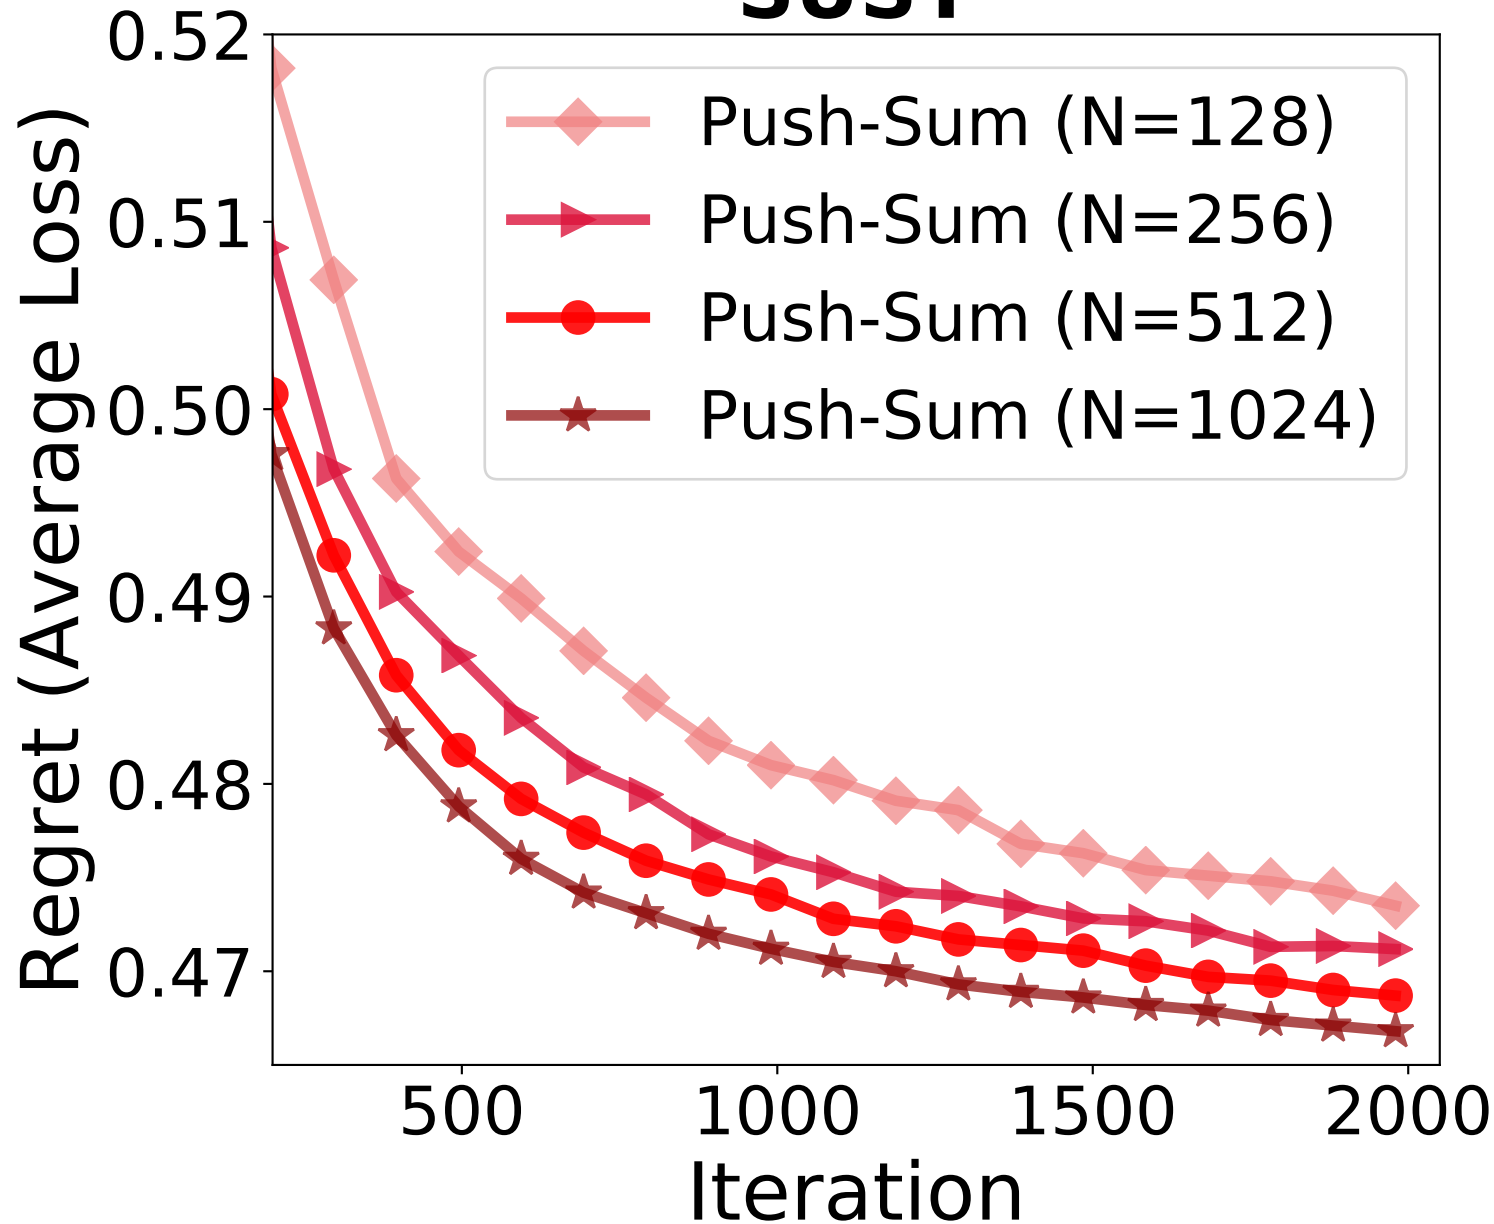

Supplement: supplementary_material [file attachment]

# Room Occupancy

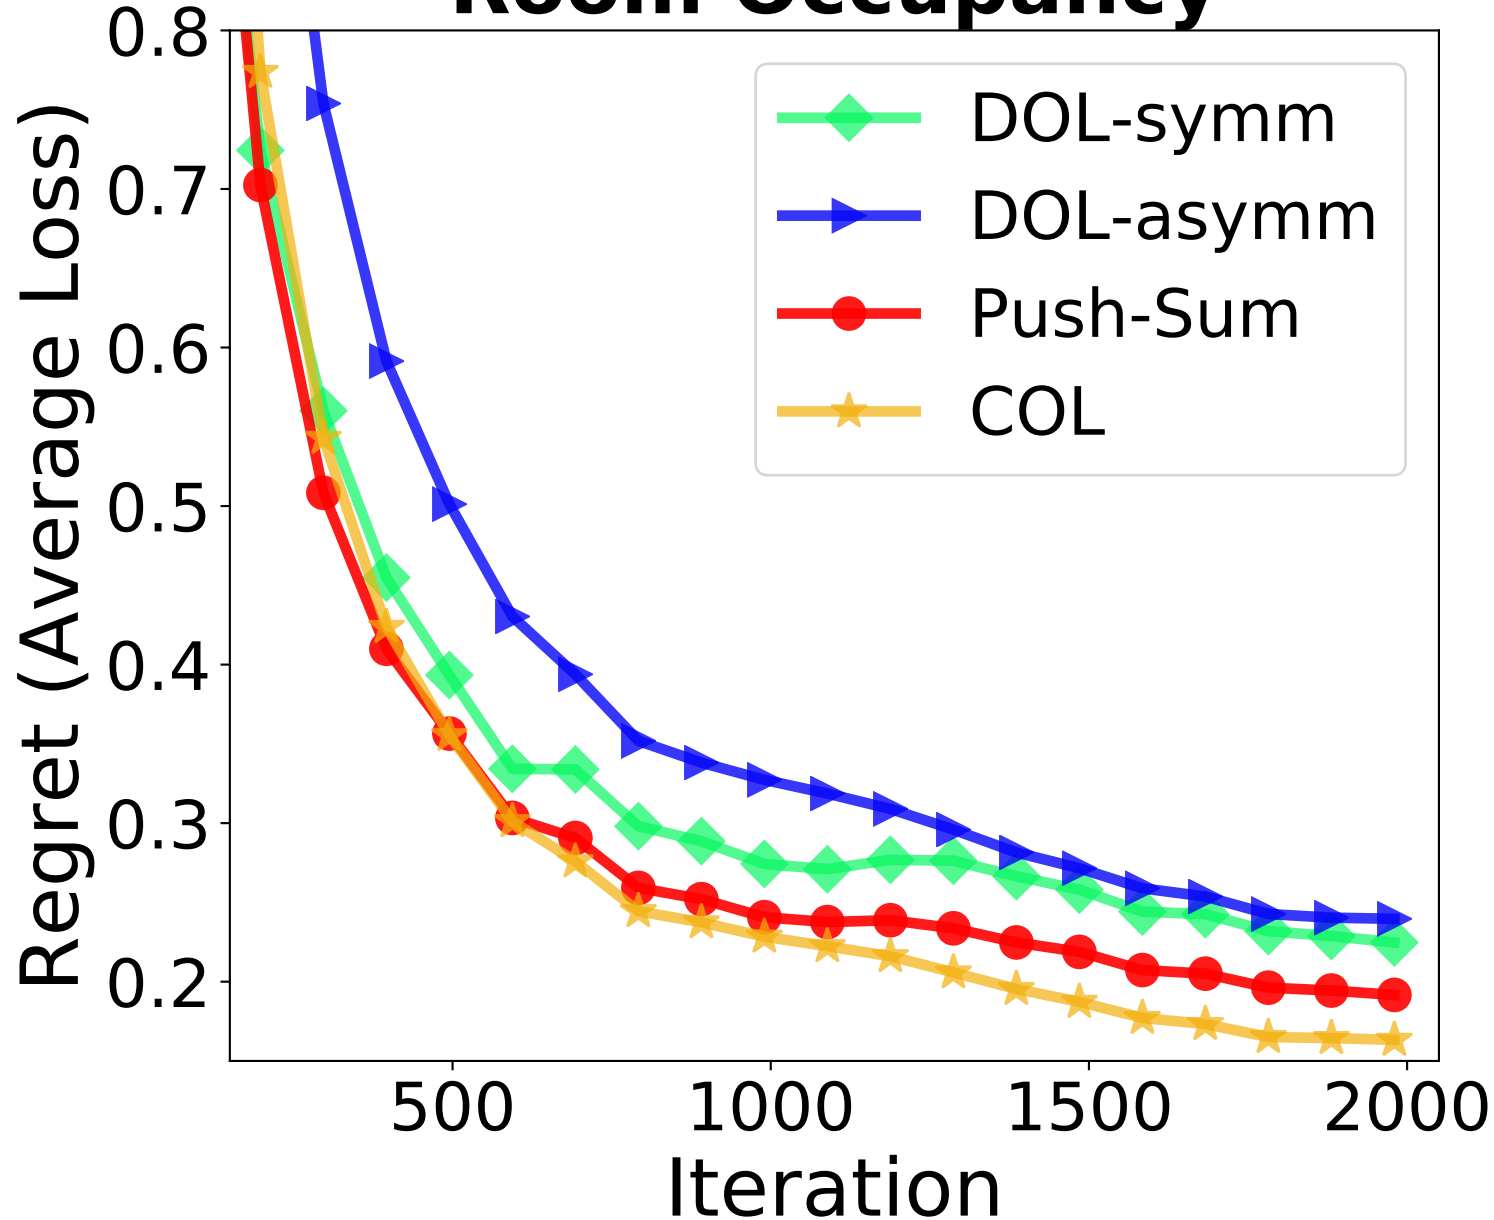

Supplement: supplementary_material [file attachment]

# SUSY

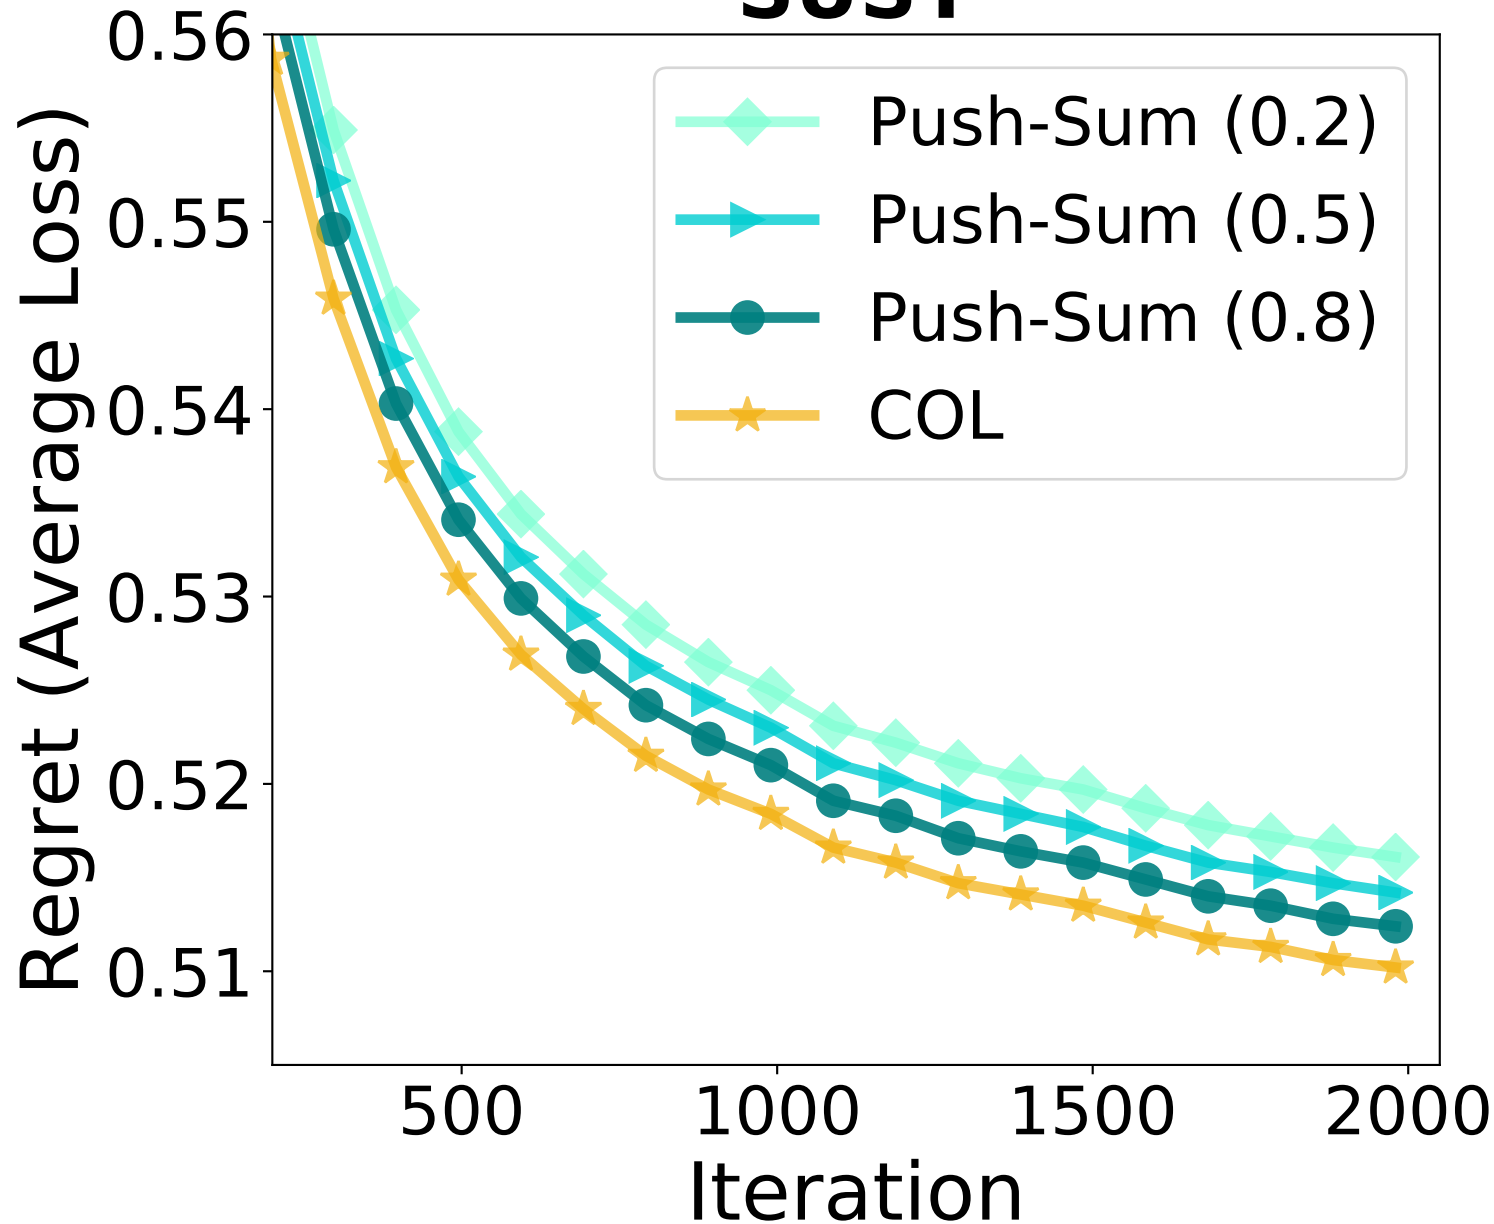

Supplement: supplementary_material [file attachment]

# Room Occupancy

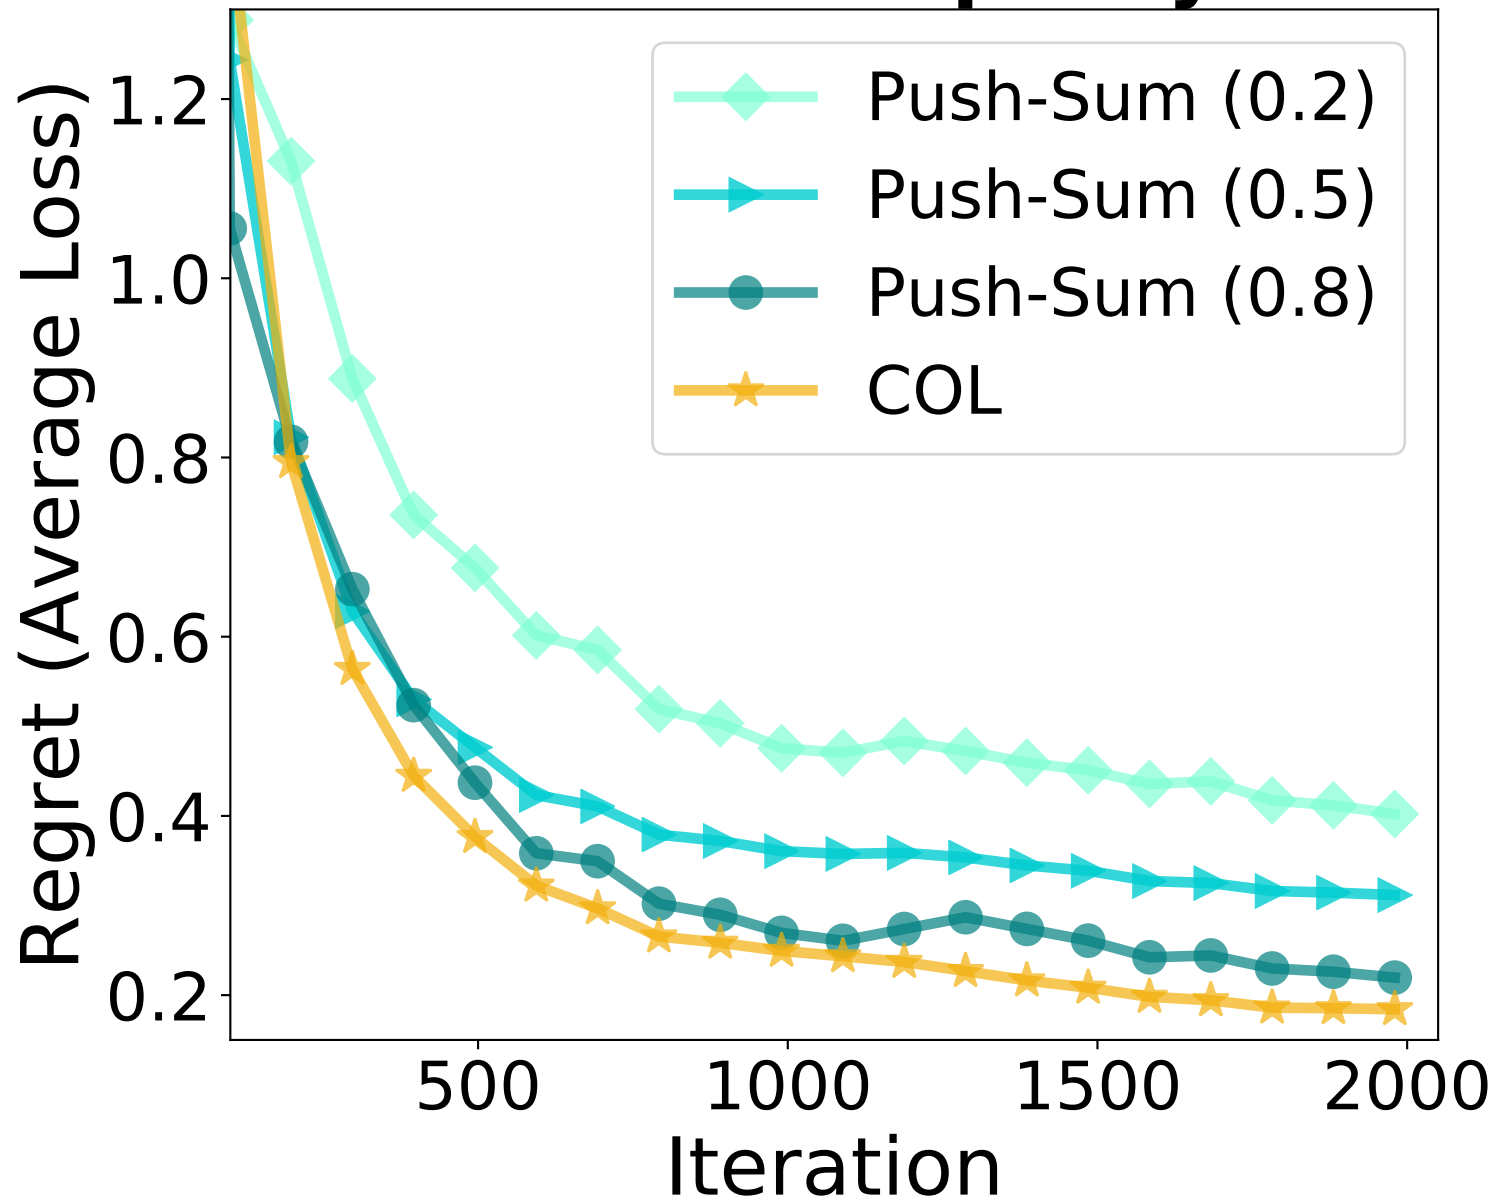

Supplement: supplementary_material [file attachment]

# Room Occupancy

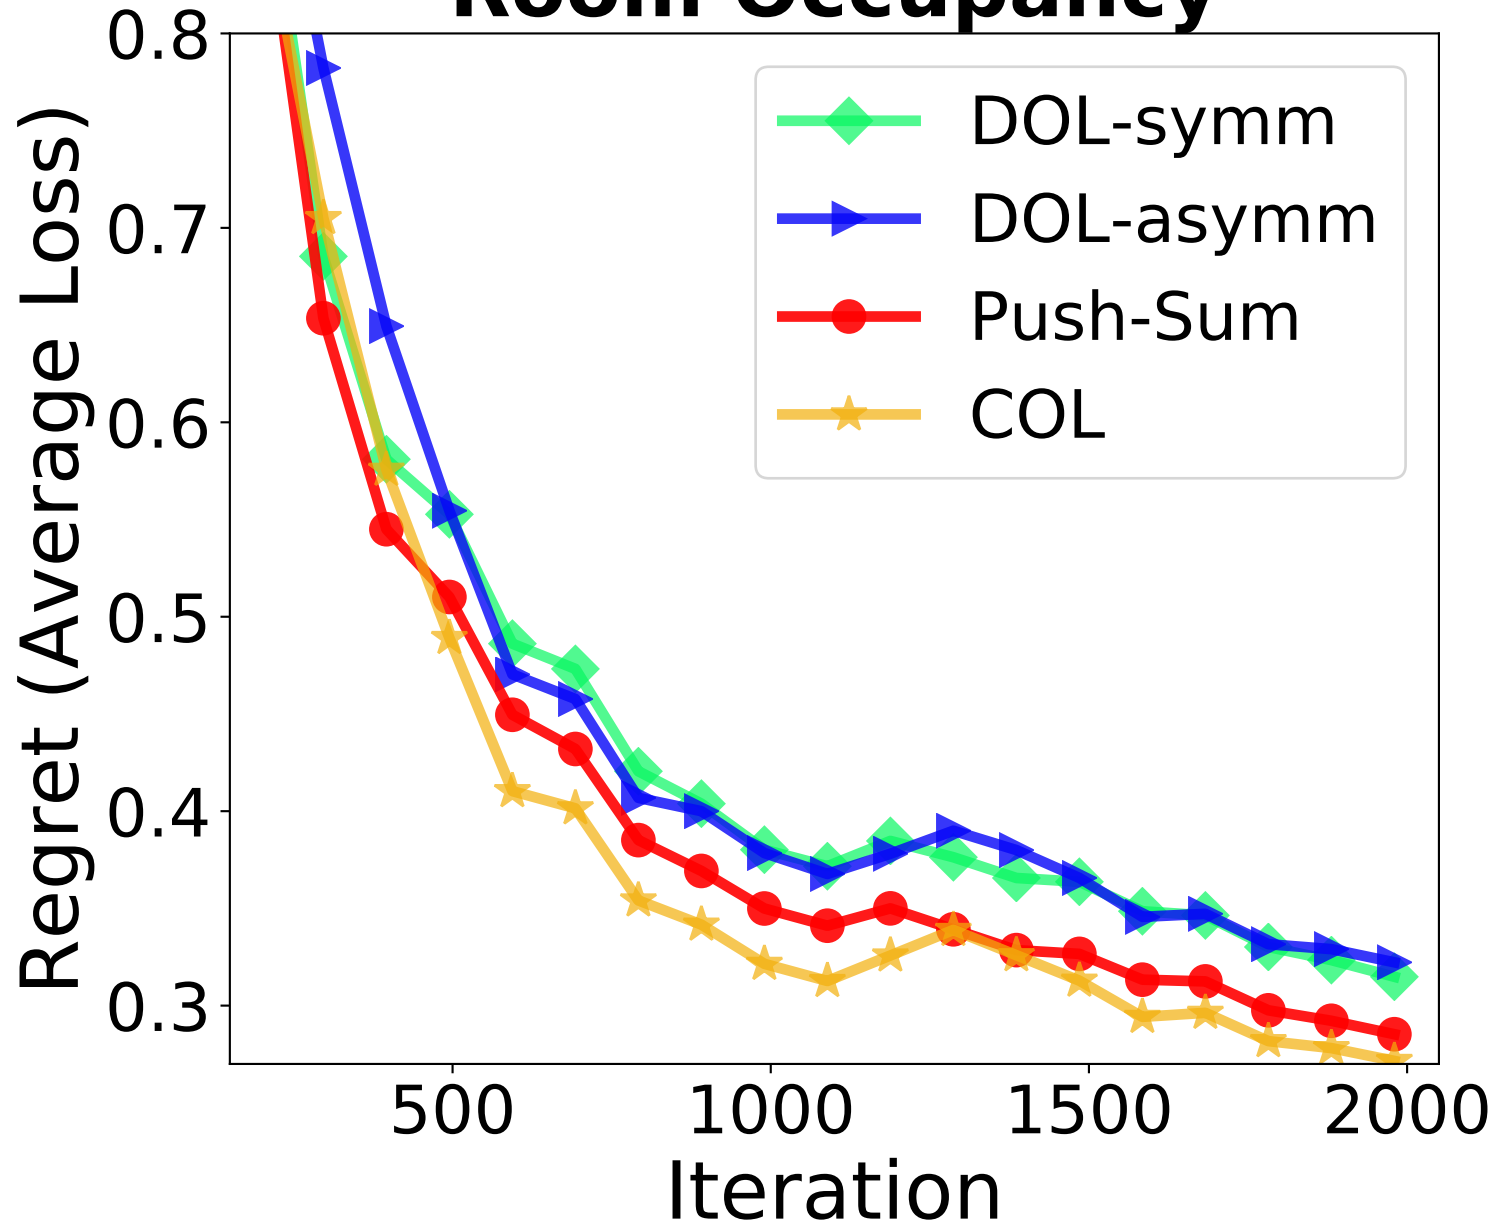

Supplement: supplementary_material [file attachment]

# SUSY

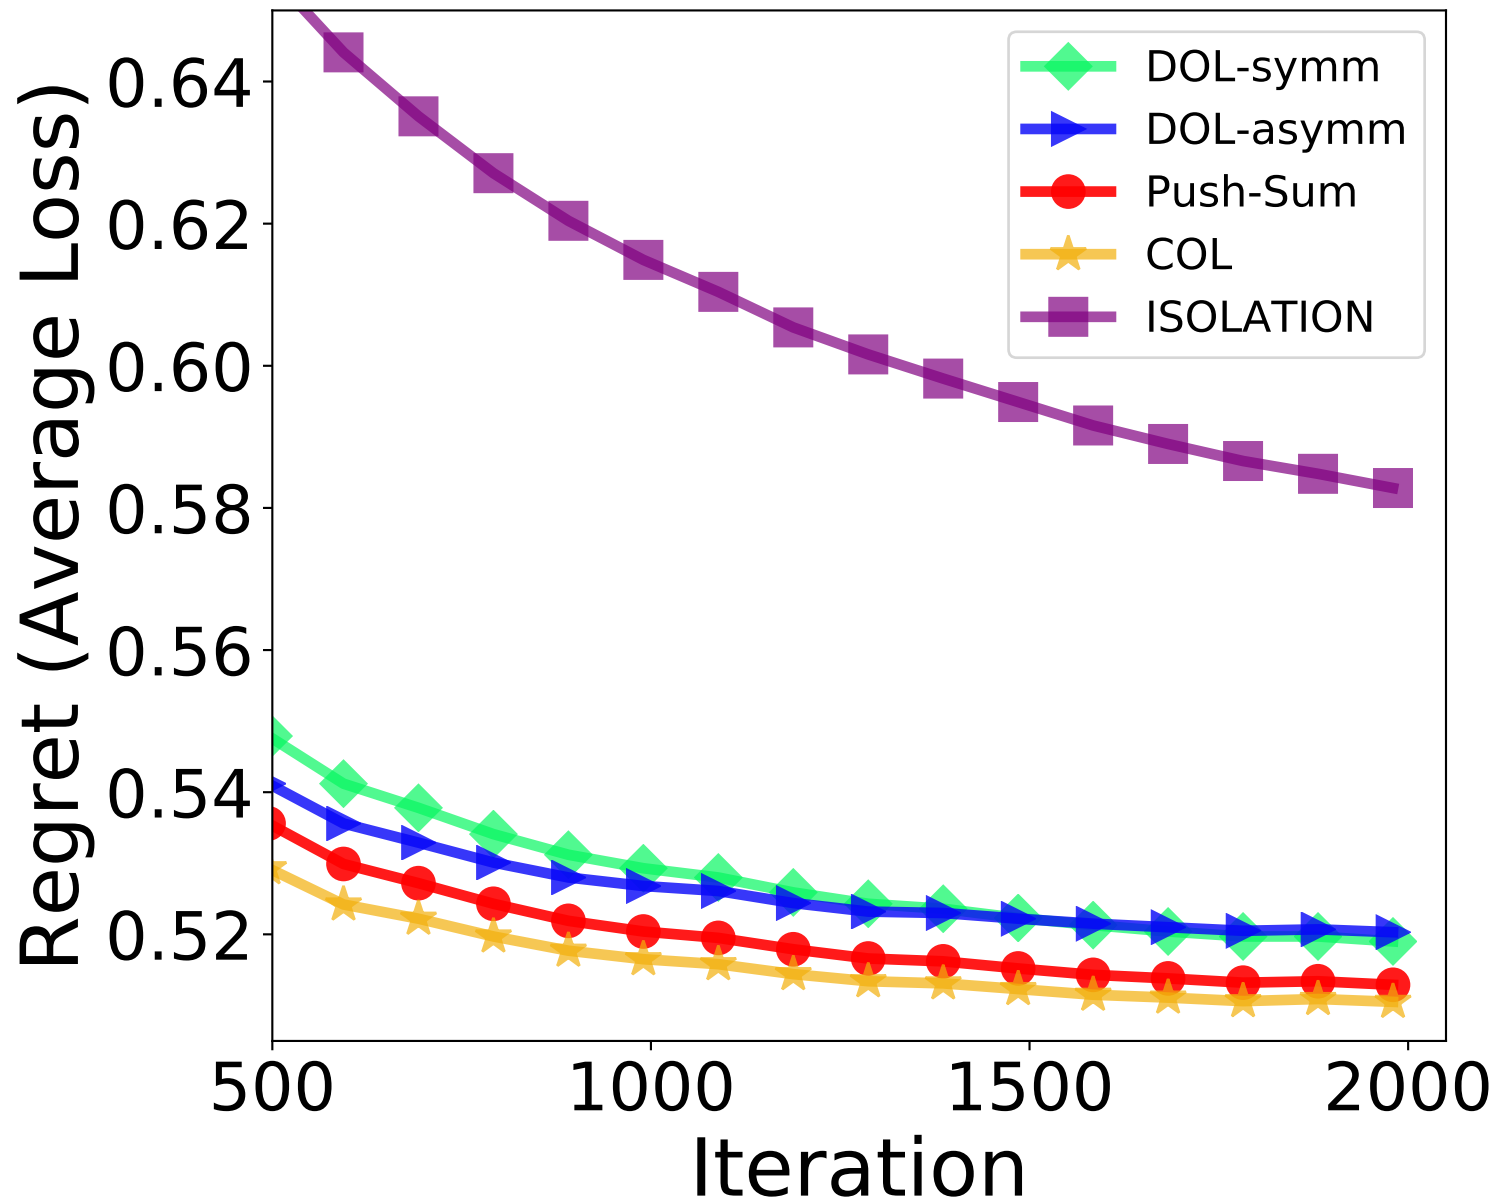

Supplement: supplementary_material [file attachment]
